# Supplementary material
Source: Royal Society of Chemistry journal article supplement (doi:10.1039/d6nr01191h)
Supplement: d6nr01191h3.pdf [file d6nr01191h3.pdf]

1 **Plasma-induced pre-oxidation of ultrathin aluminum layers for enhanced**  
2 **oxidation resistance of copper nanofilms**

3 *Na Li<sup>a</sup>, Hongrong Wu<sup>a,b\*</sup>, Wenhui Tang<sup>a</sup>, Xinbo Ma<sup>a</sup>, Junhua Zhao<sup>a,b\*</sup>*

4 <sup>a</sup> Jiangsu Key Laboratory of Advanced Food Manufacturing Equipment and  
5 Technology, Institute of Strength and Multi-scale Mechanics of Mechanical Structures,  
6 School of Mechanical Engineering, Jiangnan University, 214122 Wuxi, PR China

7 <sup>b</sup> Jiangsu Province Engineering Research Center of Micro-Nano Additive and  
8 Subtractive Manufacturing, Institute of Advanced Technology, Jiangnan University,  
9 214122 Wuxi, PR China

10 \*E-mail: [junhua.zhao@163.com](mailto:junhua.zhao@163.com), [hongrongwu@jiangnan.edu.cn](mailto:hongrongwu@jiangnan.edu.cn)

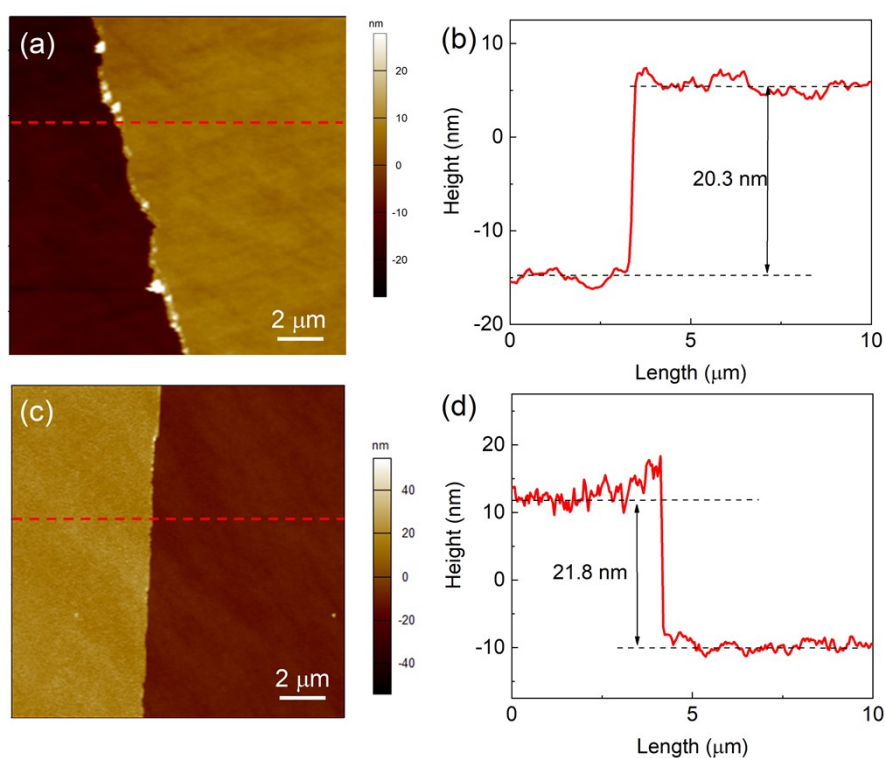

11  
12 Fig. S1 (a) AFM image of Au electrode; (b) height profile measured along the red  
13 dashed line in (a). (c) AFM image of Cu nanofilm; (b) height profile measured along  
14 the red dashed line in (d).

15 The AFM characterization confirmed that the thickness of the deposited Au  
16 electrode and Cu nanofilm was 20.3 and 21.8 nm, respectively.

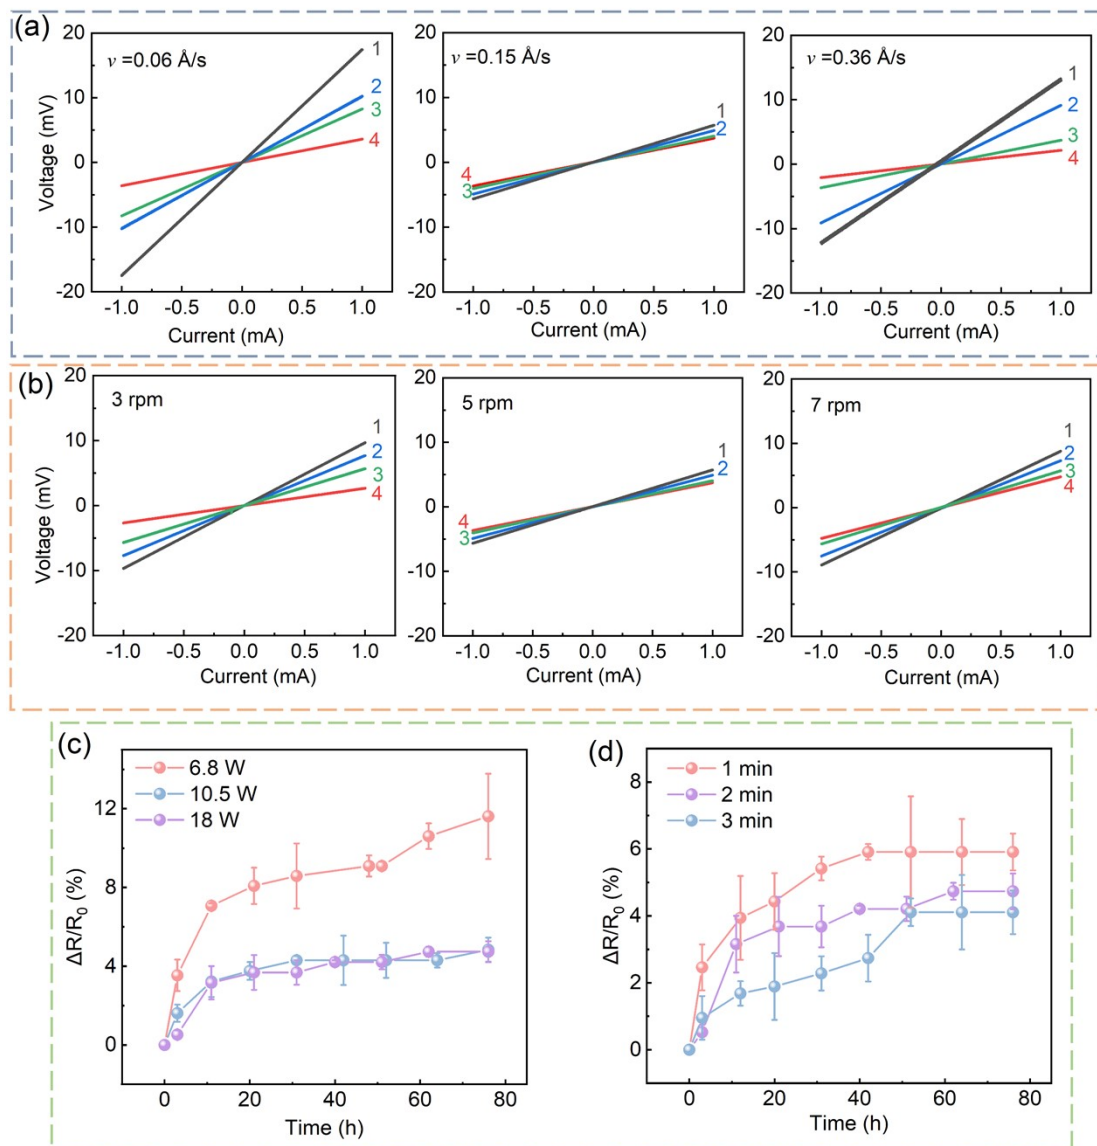

1

2 Fig. S2 The I-V curves of 20 nm copper films deposited at (a) different rates and (b)  
 3 different rotational rates of substrates. The time-dependent  $\Delta R/R_0$  of Cu@Al 3 nm  
 4 under HTHH conditions after plasma treatment with (c) different powers for 2 min and  
 5 (d) different durations at power of 18 W.

6 The deposition rate and substrate rotation speed significantly affect the electrical  
 7 performance and film uniformity. As shown in Fig. S2(a), excessively low or high  
 8 deposition rates lead to increased resistance fluctuation, suggesting reduced film  
 9 uniformity and compactness. Similarly, Fig. S2(b) shows that inappropriate substrate  
 10 rotation speeds also deteriorate the electrical uniformity of the films. Among the  
 11 investigated conditions, the lowest resistance variation was obtained at a deposition rate

1 of 0.15 Å/s and a substrate rotation speed of 5 rpm. Based on these results, the optimized  
2 deposition conditions were selected for subsequent fabrication of the Cu@Al films.

3 The influence of plasma parameters on the oxidation resistance of Cu@Al 3 nm  
4 films was investigated under HTHH conditions. As shown in Fig. S2(c), increasing the  
5 plasma power from 6.8 W to 10.5 W significantly improves the oxidation resistance,  
6 indicating that insufficient plasma power results in incomplete oxidation of the Al layer  
7 and limited barrier effectiveness. Further increasing the power to 18 W results in  
8 comparable protection performance. Similarly, Fig. S2(d) shows that increasing the  
9 treatment duration from 1 min to 2 min significantly enhances the protection  
10 performance, while further increasing the duration to 3 min leads to only marginal  
11 improvement, suggesting that a sufficiently stable oxide barrier can already be  
12 established under moderate plasma-treatment conditions.

13 Importantly, comparable protection performance was obtained under both 10.5 W  
14 and 18 W plasma power, as well as for treatment durations of 2 min and 3 min. This  
15 indicates that the identified critical thickness of ~3 nm is not restricted to a single  
16 narrowly defined processing condition, but remains effective within a reasonably broad  
17 plasma-processing window under the present experimental system. Based on the above  
18 results, 18 W and 2 min were selected as the standard plasma-treatment conditions for  
19 subsequent experiments to ensure stable and reproducible oxidation behavior.

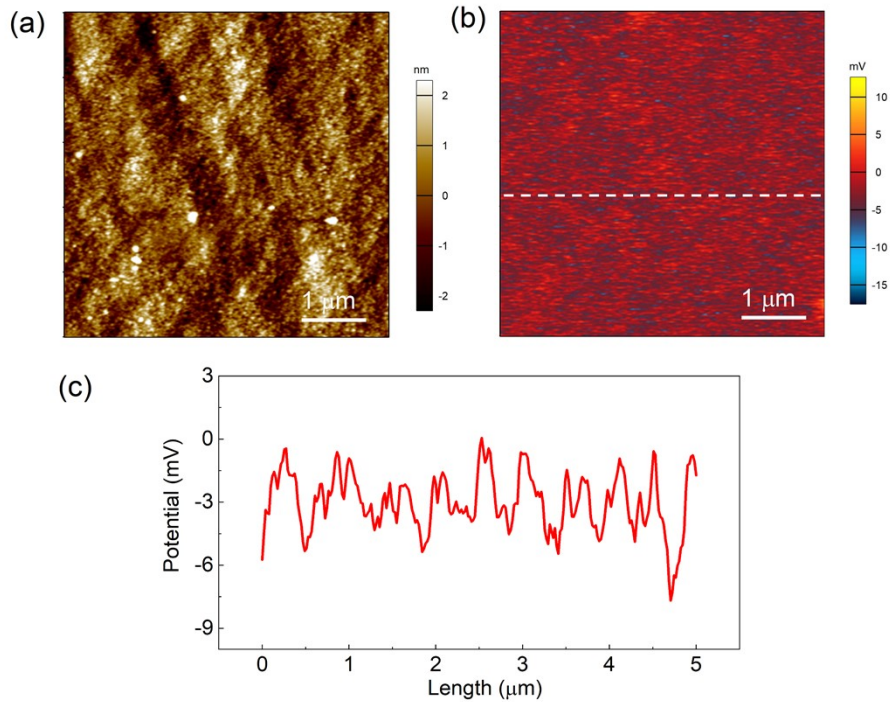

1

2 Fig. S3 (a) Surface morphology and (b) surface potential of freshly cleaved HOPG, (c)  
 3 surface potential profile along the white dashed line in (b).

4 As shown in Fig.S3, the work function of the probe (HQ NSC8/Cr-Au) was  
 5 calibrated using freshly cleaved HOPG. The contact potential difference (CPD)  
 6 between the probe and HOPG was approximately -3 mV. Given that the work function  
 7 of HOPG is known to be 4.475 eV, thus the work function of the probe was accordingly  
 8 determined to be 4.478 eV based on Equation (1). According to Equation (2), the  
 9 surface potential of the probe was set to 4.478 V.

10

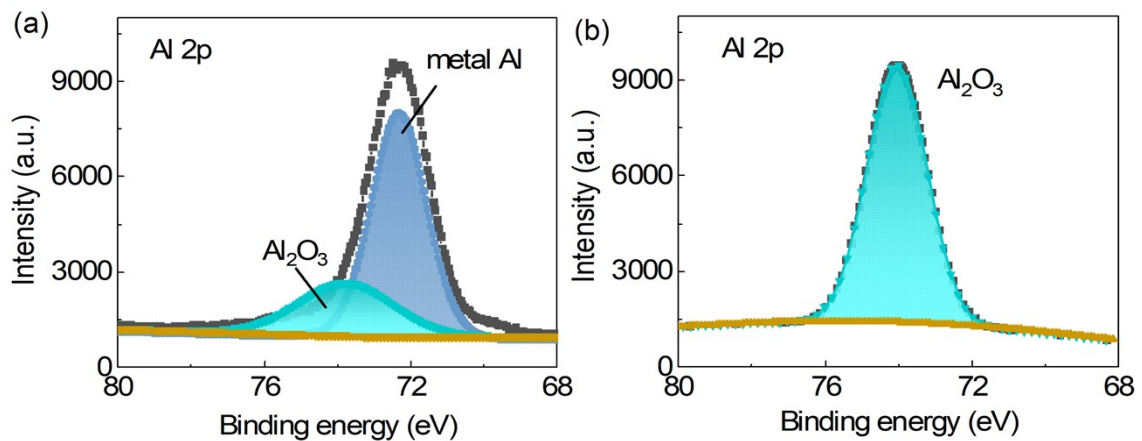

11

12 Fig. S4 Al 2p spectra of (a) Cu@Al 3 nm and (b) Cu@Al 3 nm-P.

1 Table S1. Relative Al<sub>2</sub>O<sub>3</sub> and metallic Al peak contributions derived from Al 2p XPS  
 2 spectra of Cu@Al films before and after plasma treatment.

| Sample       | Metallic Al (%)       | Al <sub>2</sub> O <sub>3</sub> (%) |
|--------------|-----------------------|------------------------------------|
| Cu@Al 3 nm   | ~71.2%                | ~28.8%                             |
| Cu@Al 3 nm-P | Below detection limit | Dominant                           |

3

4 For the Cu@Al 3 nm sample, binding energies at 72.4 eV and 73.8 eV are  
 5 associated to metal Al and Al<sub>2</sub>O<sub>3</sub><sup>1, 2</sup>. The oxide layer thickness of untreated sample was  
 6 calculated using Strohmeier<sup>3</sup>, assuming that the oxide and metal phases are spatially  
 7 separated.

$$8 \quad d = \lambda_0 \sin \theta \ln \left[ \frac{N_m \lambda_m I_o}{N_o \lambda_o I_m} + 1 \right] \quad (S1)$$

9 where  $d$  is the thickness of oxide layer,  $\lambda_m$  and  $\lambda_o$  represent the inelastic mean free paths  
 10 of photoelectrons in the metal and oxide layer, with values of 30.85 Å and 32.56 Å<sup>4</sup>,  
 11 respectively. The photoelectron emission angle  $\theta$  relative to the sample surface was set  
 12 to 90°. The volume densities  $N_m$  and  $N_o$  are of the metal and oxide layer were taken as  
 13 2.7 and 3.99 g/cm<sup>34</sup>.  $I_m$  and  $I_o$  are the peak intensity of the metal and oxide layer.

14 Based on this calculation, the oxide layer on the surface of Cu@Al was  
 15 approximately 0.64 nm, which is consistent with the literature report<sup>5</sup>. Peak fitting  
 16 results summarized in Table S1 further show that the untreated sample contains  
 17 approximately 71.2% metallic Al and 28.8% Al<sub>2</sub>O<sub>3</sub>. After plasma treatment, the Al<sub>2</sub>O<sub>3</sub>  
 18 signal is dominant becomes dominant, while the metallic Al signal becomes nearly  
 19 undetectable. Under this condition, the Strohmeier method is no longer reliable because  
 20 the metallic Al intensity required for thickness calculation becomes too weak for  
 21 accurate analysis. Considering the initial Al thickness of only 3 nm, the strong  
 22 suppression of the metallic Al component together with the dominant Al<sub>2</sub>O<sub>3</sub> signal  
 23 suggests that plasma treatment promotes oxidation throughout most of the ultrathin Al  
 24 layer.

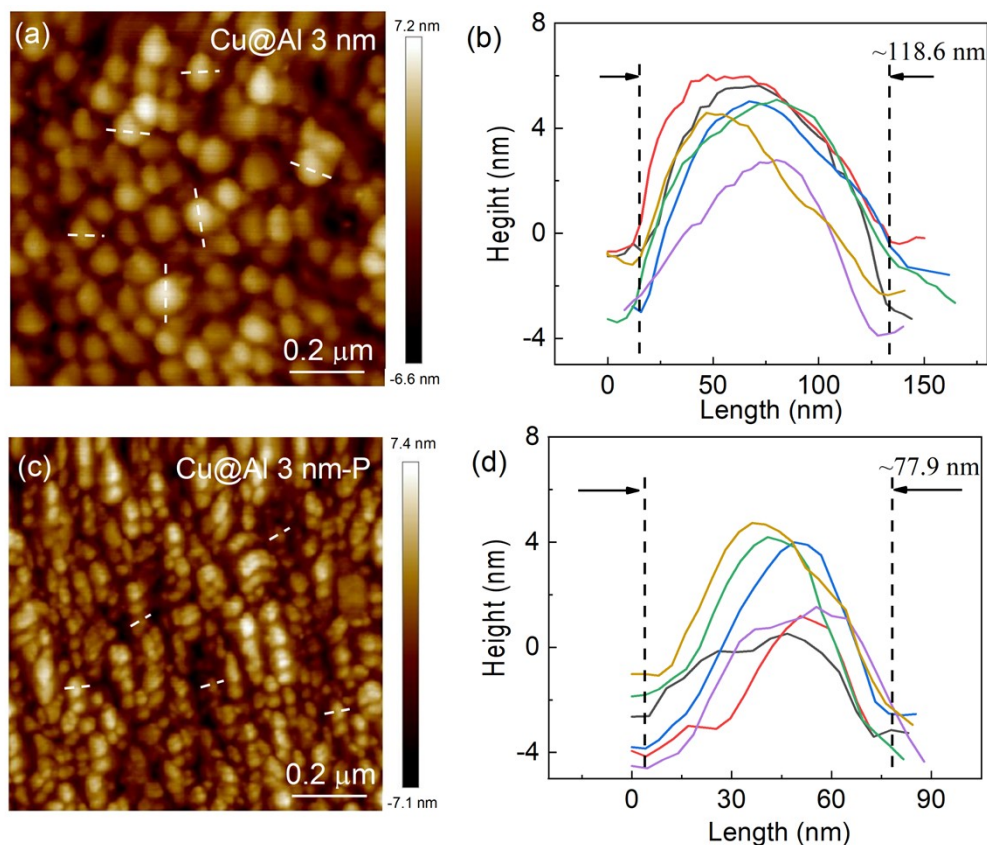

1

2 Fig. S5 (a) Surface morphology of Cu@Al; (b) the height profile along the white dashed  
 3 line in (a). (c) Surface morphology of Cu@Al-P; (d) the height profile along the white  
 4 dashed line in (c).

5 Due to the plasma etching effect, the average particle diameter decreased from  
 6 ~118.6 nm to ~77.9 nm after treatment.

7

## 8 References

- 9 1. I. Iatsunskyi, M. Kempinski, M. Jancelewicz, K. Załęski, S. Jurga and V.  
 10 Smyntyna, *Vacuum*, 2015, **113**, 52-58.
- 11 2. P. M. A. Sherwood, *Surf. Sci. Spectra*, 1998, **5**, 1-3.
- 12 3. B. R. Strohmeier, *Surf. Interface Anal.*, 1990, **15**, 51-56.
- 13 4. S. Knust, A. Kuhlmann, T. L. Arcos and G. Grundmeier, *RSC Adv.*, 2019, **9**,  
 14 35077-35088.
- 15 5. L. P. H. Jeurgens, W. G. Sloof, F. D. Tichelaar and E. J. Mittemeijer, *J. Appl.*  
 16 *Phys.*, 2002, **92**, 1649-1656

17

18
