# Supplementary material
Source: Royal Society of Chemistry journal article supplement (doi:10.1039/d6nr01191h)

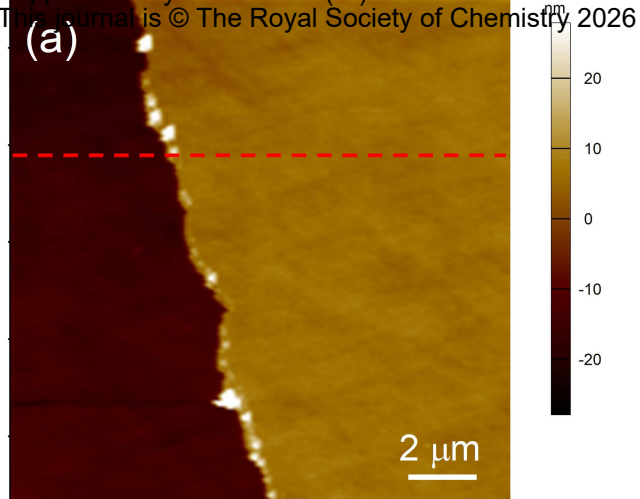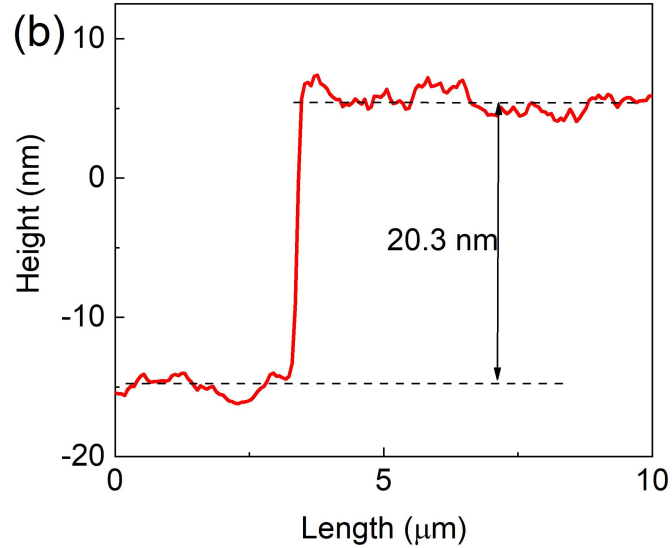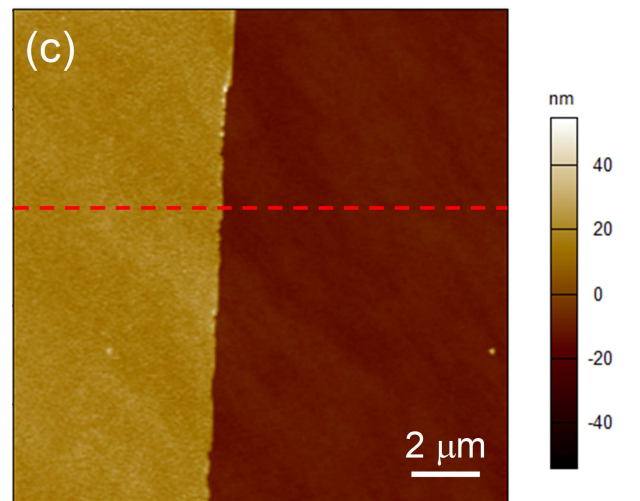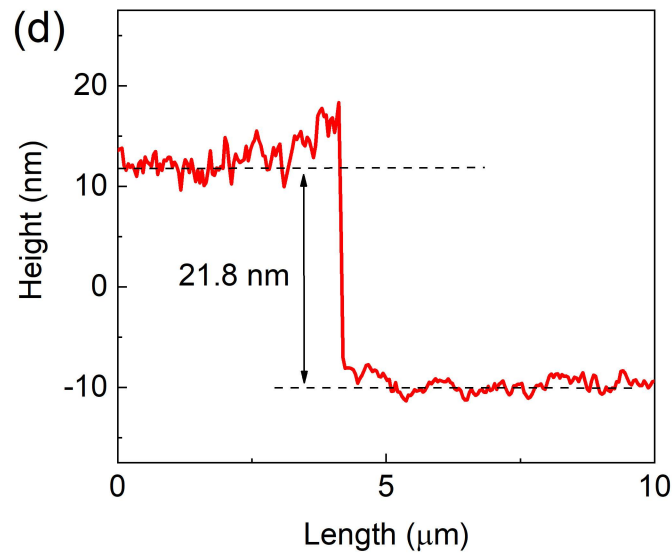

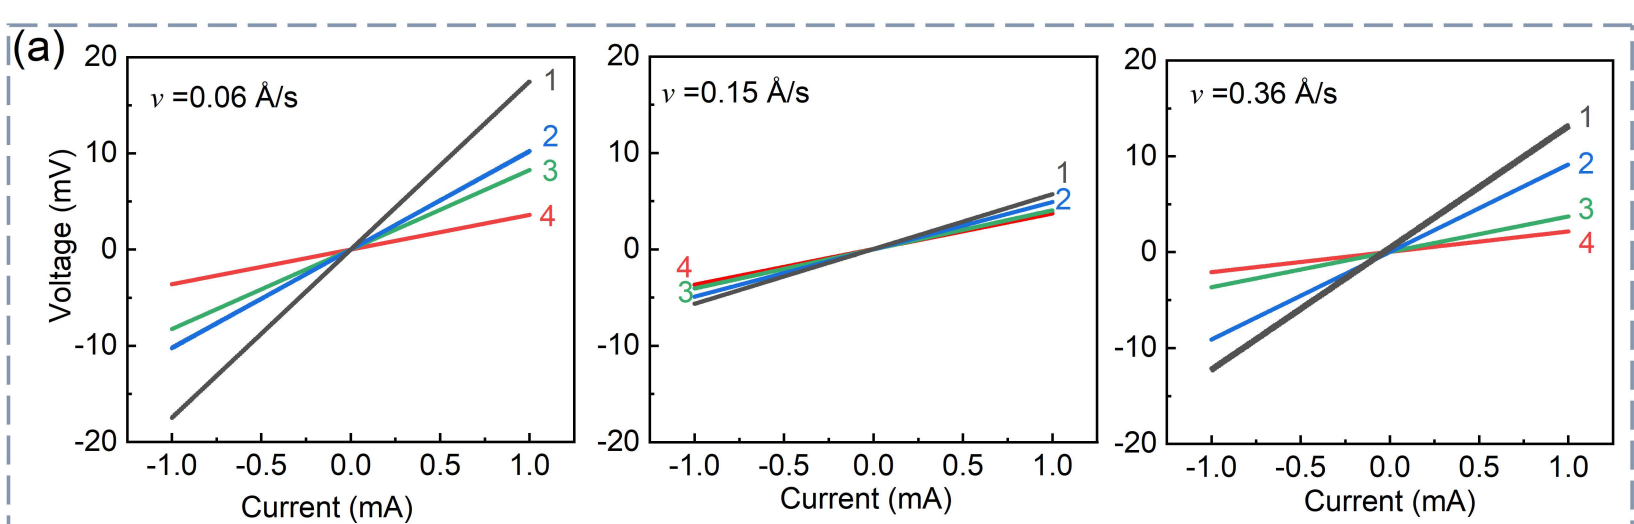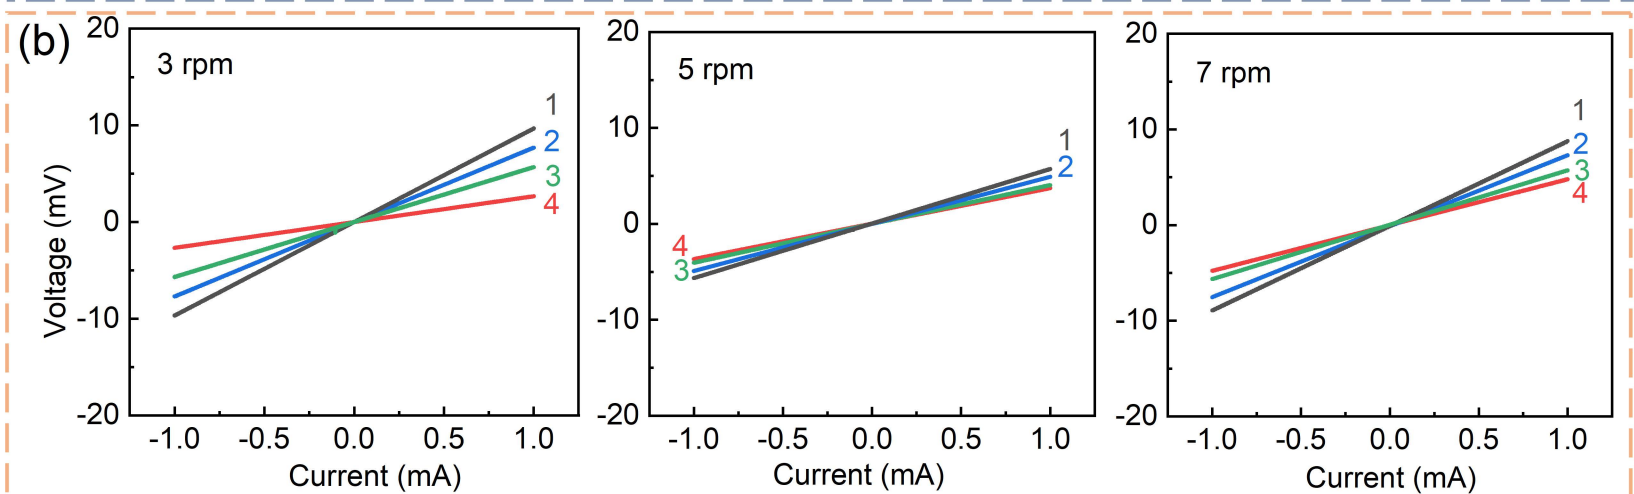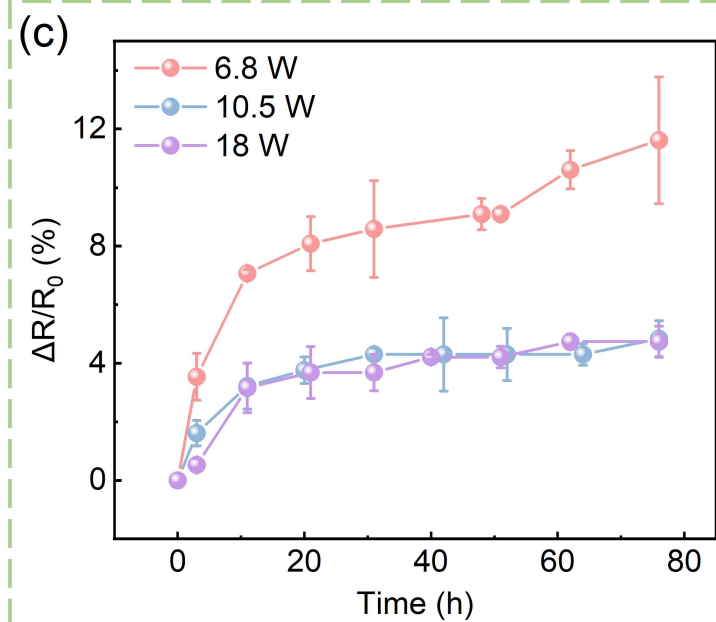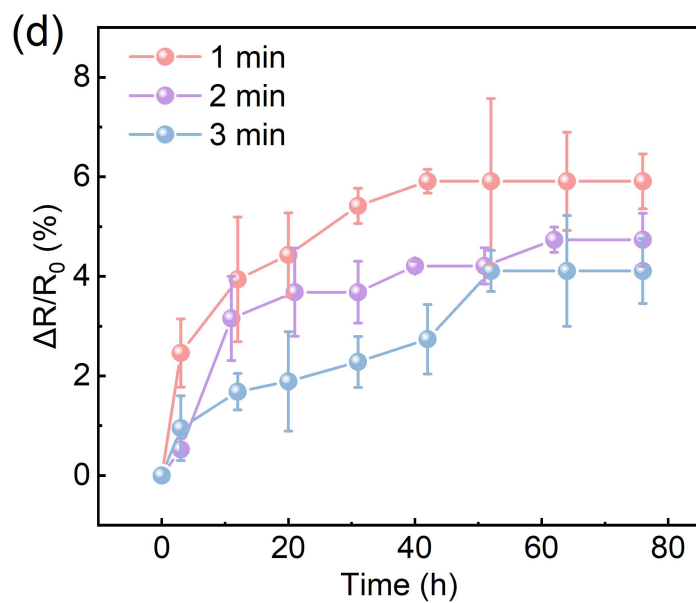

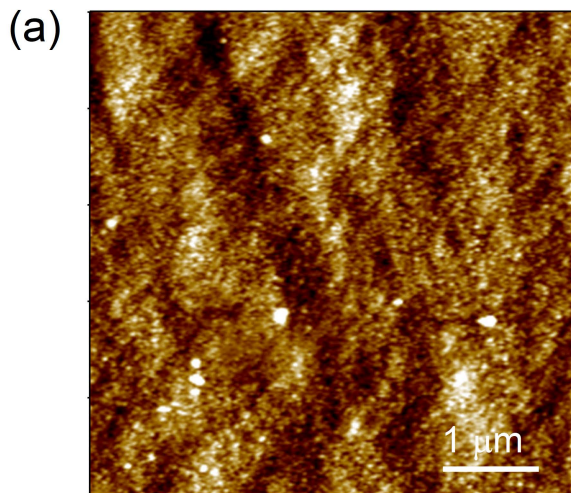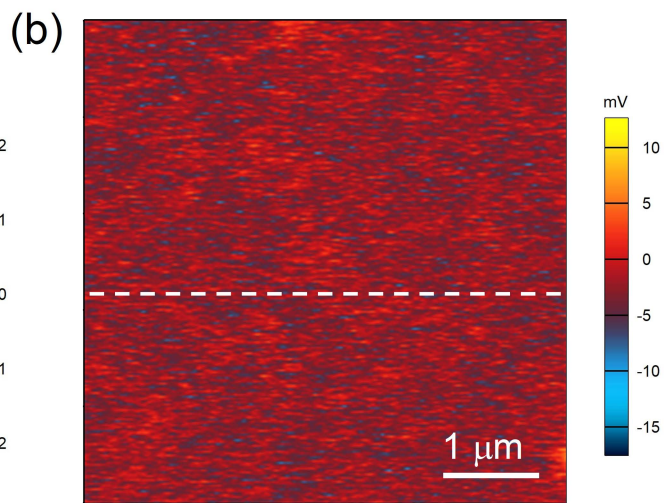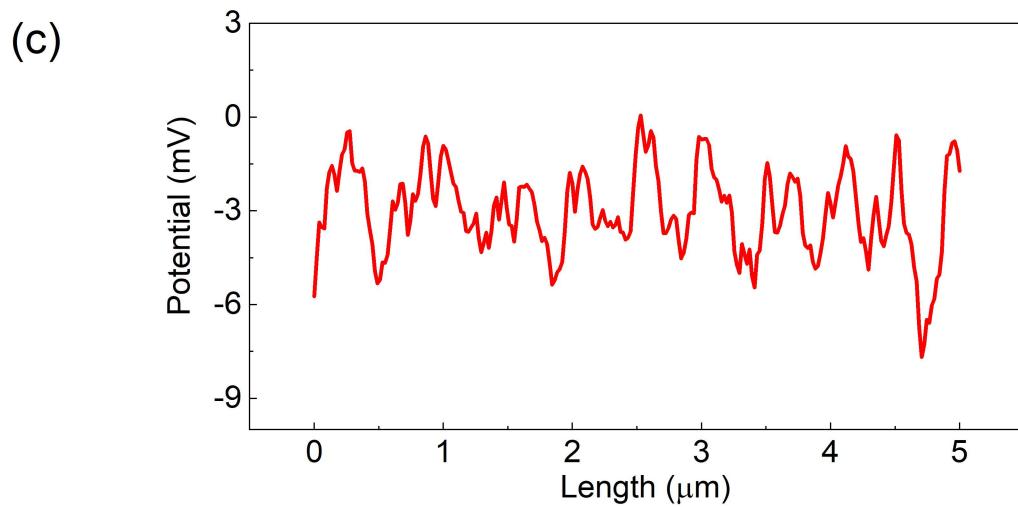

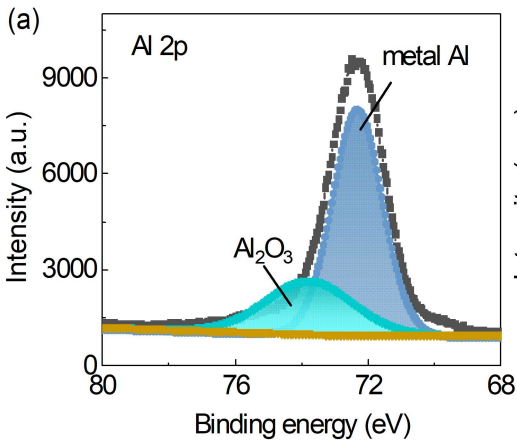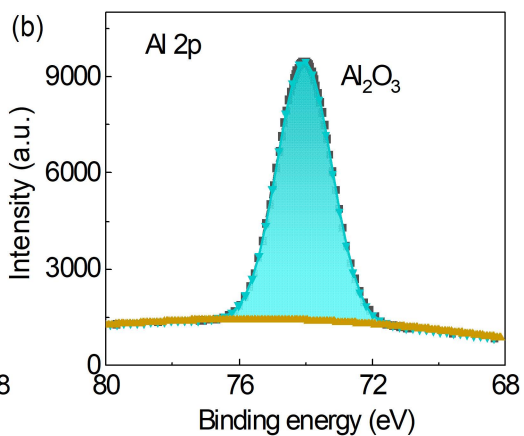

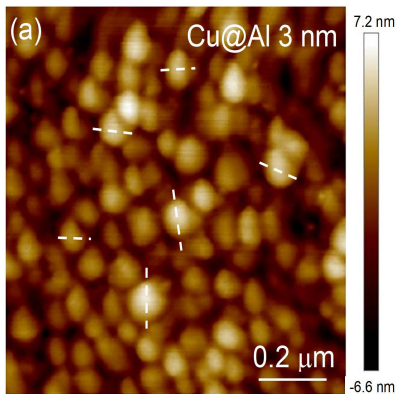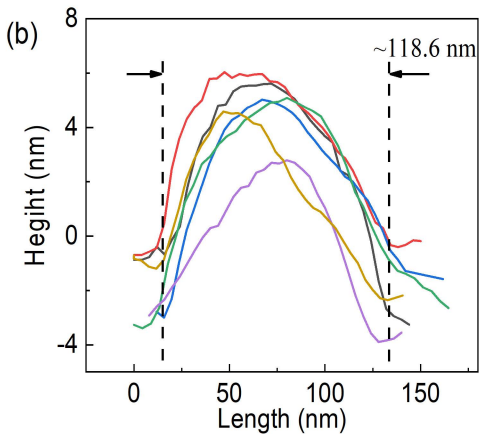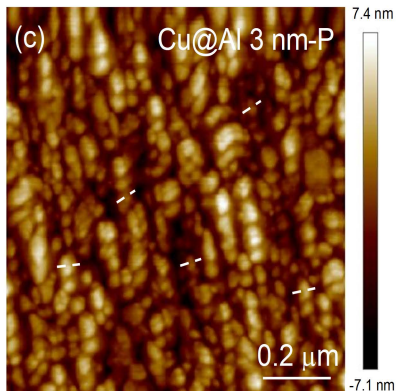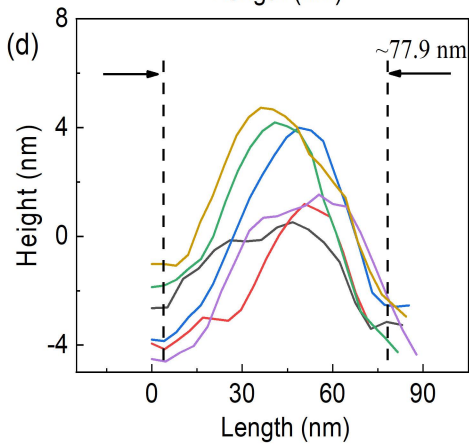

Supplement: d6nr01191h2.pdf [file d6nr01191h2.pdf]
